# Supplementary material
Source: MDPI journal article supplement (https://www.mdpi.com/2073-4352/10/6/532)
Supplement: s1 [file s1]

## Material properties of Ti-48Al-2Cr-2Nb for simulation

In this section the thermophysical properties of the bulk material of Ti-48Al-2Cr-2Nb implemented for the single layer simulation are listed [1].

**Table 4.** Material properties of Ti-48Al-2Cr-2Nb.

|                                         |        |
|-----------------------------------------|--------|
| Density at 323 K [Kg/ mm <sup>3</sup> ] | 4.18   |
| Solidus temperature [K]                 | 1737.5 |
| Liquidus temperature [K]                | 1800   |
| Latent heat [KJ/kg]                     | 377    |

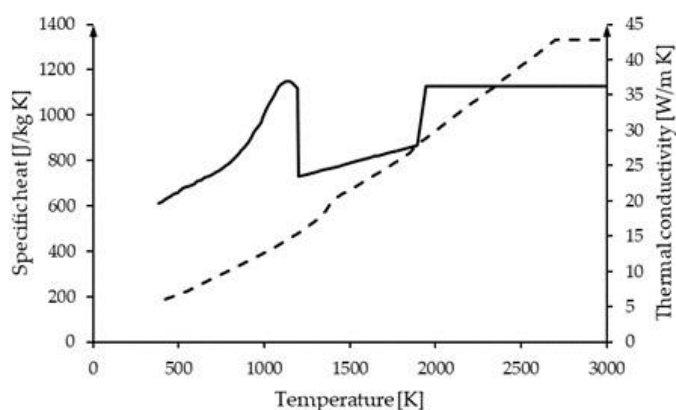

**Figure 6.** Specific heat and thermal conductivity of Ti-48Al-2Cr-2Nb.

### References

- [1] Cagran C, Wilthan B, Pottlacher G, Roebuck B, Wickins M, Harding RA. Thermophysical properties of a Ti-44%Al-8%Nb-1%B alloy in the solid and molten states. *Intermetallics*, 2003. doi:10.1016/S0966-9795(03)00175-4.
